(E12)

**POTATO:** *Solanum tuberosum* L., 'Russet Burbank'**FULL SEASON INSECTICIDE MANAGEMENT PROGRAMS FOR THE CONTROL OF COLORADO POTATO BEETLE IN WISCONSIN POTATO, 2013****Russell L. Groves**

University of Wisconsin-Madison  
 Entomology Department  
 1630 Linden Drive  
 Madison, WI 53706  
 Phone: 608-262-3229  
 Fax: 608-262-3322  
 Email: groves@entomology.wisc.edu

**Scott Chapman**

Email: chapman@entomology.wisc.edu

**Anders S. Huseth**

Email: ashuseth@wisc.edu

**Linda K. Crubaugh**

Email: crubaugh@wisc.edu

**Kenneth E. Frost**

Email: kfrost@wisc.edu

Colorado potato beetle (CPB): *Leptinotarsa decemlineata* (Say)

Potato leafhopper (PLH): *Empoasca fabae* (Harris)

Green peach aphid (GPA): *Myzus persicae* (Sulzer)

The purpose of this experiment was to evaluate various full-season, reduced-risk, insecticide programs designed to manage Colorado potato beetle (CPB) on potatoes in Wisconsin. With developing neonicotinoid insecticide resistance among CPB populations in the potato production areas in Wisconsin, several systemic based and foliar based programs were designed to evaluate their effectiveness on managing the CPB on potato. This experiment was conducted in 2013 on a loamy sand soil at Hancock Agricultural Research station (HAES) located 1.1 mile (1.8 km) southwest of Hancock, Wisconsin. Potato, *Solanum tuberosum* cv. 'Russet Burbank', seed pieces were planted on 2 May. Plants were spaced 12 inches apart within rows and rows were spaced 3 ft apart. The 8-row plots were 24 feet wide by 40 ft long, for a total of 0.025 acres/plot. Replicates were separated by a 5 ft border of bare ground. Three replicates of 15 full-season insecticide programs were arranged in a RCB design. Systemic insecticides were applied in-furrow at planting (2 May for treatments 1-6). The first application of Rimon (treatment 7) was made on 14 Jun. The first foliar insecticide applications were applied after peak egg hatch and prior to large larval population development (21 Jun, for treatments 7-15). Subsequent applications were made on 28 Jun (for treatments 7-15) and 25 Jul (for all treatments, including at plant treatments). Treatment information is available in Table 1. All in-furrow treatments were applied at 11.0 gpa on 2 May using a two nozzle boom equipped with Tee Jet XR8001 flat fan spray nozzles powered by a CO<sub>2</sub> backpack sprayer at 30psi. Furrows were cut using a commercial potato planter without closing discs attached. Immediately after the in-furrow treatments were applied and all seed piece treatments were placed in open furrows, all seed was covered by hilling. Foliar insecticides were applied using a CO<sub>2</sub> pressurized sprayer with a 24 ft boom operating at 30 psi delivering 20 gpa through 16 Tee Jet XR8002XR flat fan nozzles spaced 18 inches apart while travelling at 4.0 ft/s. The efficacy of treatments was assessed by counting the number of egg masses (EM), small larvae (SL), and large larvae (LL) per plant on 10 randomly selected plants in each plot. Percent defoliation (% DF) ratings were taken by visual observation of the entire plot. Potato leafhopper (PLH), *Empoasca fabae*, efficacy was assessed by counting the number of adults collected from 15 sweep net samples in each plot and replicate. Specifically, 15 pendulum sweeps were made over a single row in each of the 4 experimental replicate plots per treatment using a 15" diameter sweep net. Green peach aphid (GPA), *Myzus persicae*, and potato leafhopper nymph populations were surveyed by visual assessment of 25 leaves per plot. Insect counts occurred on several dates throughout the summer and reported means were averaged across those dates (Tables 2 & 3). Insect count averages reflect time periods during the summer when specific life stages peaked in the plots. Yield and quality data were collected after harvest (11 Sep) (Table 4).

Data sets were analyzed using ANOVA and means were compared using a Fisher’s Protected Least Significant Difference (LSD) mean separation test (P=0.05).

No signs of phytotoxicity were observed among treatments. Treatment programs outlined in this experiment were assembled to be consistent with a ‘Best Management Practices’ approach and based on insecticide resistance management guidelines (<http://www.irac-online.org/>). No single treatment in this experiment was designed as an untreated control so as to limit the extent of inter-plot interfere that might result from uncontrolled populations of insects randomized within the experiment. Taken together, all plots performed similarly in terms of controlling populations of CPB and producing commercially acceptable yields. Although we did observe some significant differences among treatments with some lifestages of the CPB, and with defoliation estimates, these means are well below economic thresholds that would warrant another approach. In only a few treatment programs did we observe significant differences in populations of PLH, and here again, these populations are well within the limits of allowable population numbers when averaging over the season. This research was partially supported by industry gifts including products and research funding.

Table 1.

| Trt | 1st generation CPB |                                | 2nd generation CPB |      | Type   | Appl. Date                         | Insecticide/formulation | Rate amt/acre | Type |
|-----|--------------------|--------------------------------|--------------------|------|--------|------------------------------------|-------------------------|---------------|------|
|     | Appl. Date         | Insecticide/formulation        | Rate amt/acre      | Type |        |                                    |                         |               |      |
| 1   | 2-May              | Platinum 75 SC                 | 2.67 fl oz         | IF   | 28-Jun | <sup>a</sup> Besiege 1.25ZC        | 9 fl oz                 | F             |      |
| 2   | 2-May              | Belay 2.13 SC                  | 12 fl oz           | IF   | 25 Jul | <sup>a</sup> Besiege 1.25 ZC       | 7.5 fl oz               | F             |      |
|     |                    |                                |                    |      | 28-Jun | <sup>a</sup> Agri-Mek 0.7 SC       | 3.5 fl oz               | F             |      |
| 3   | 26-Apr             | <sup>a</sup> Verimark 20 SC    | 10 fl oz           | IF   | 25 Jul | <sup>a</sup> Agri-Mek 0.7 SC       | 3.0 fl oz               | F             |      |
|     |                    | Blackhawk 36 WG                | 3.3 oz wt          | F    | 28-Jun | Assail 30 SG                       | 4 oz wt                 | F             |      |
| 4   | 26-Apr             | Verimark                       | 13.5 fl oz         | IF   | 25-Jul | Assail 30 SG                       | 3 oz wt                 | F             |      |
|     |                    | <sup>b</sup> Agri-Mek 0.7 SC   | 3.5 fl oz          | F    | 28-Jun | <sup>a</sup> Actara 25 WDG         | 3 oz wt                 | F             |      |
| 5   | 2-May              | Admire Pro 4.6SC               | 8.7 fl oz          | IF   | 25-Jul | <sup>a</sup> Actara 25 WDG         | 2.5 oz wt               | F             |      |
|     |                    | Agri-Mek 0.7 SC                | 3.5 fl oz          | F    | 28-Jun | <sup>b</sup> Radiant 1 SC          | 8 fl oz                 | F             |      |
| 6   | 2-May              | Scorpion 3.24 SC               | 13.25 fl oz        | IF   | 25-Jul | <sup>b</sup> Radiant 1 SC          | 6 fl oz                 | F             |      |
|     |                    | Blackhawk 36 WG                | 3.3 oz wt          | F    | 28-Jun | <sup>b</sup> Athena 0.87 SC        | 17 fl oz                | F             |      |
| 7   | 14-Jun             | <sup>c</sup> Rimon 0.83 EC     | 10 fl oz           | F    | 25-Jul | <sup>b</sup> Athena 0.87 SC        | 17 fl oz                | F             |      |
|     |                    | <sup>c</sup> Rimon 0.83 EC     | 7 fl oz            | F    |        | <sup>d</sup> Exirel 10 SE          | 6.75 fl oz              | F             |      |
| 8   | 21-Jun             | <sup>c</sup> Rimon 0.83 EC     | 7 fl oz            | F    |        |                                    |                         |               |      |
|     |                    | <sup>d</sup> Coragen 1.67 SC   | 5 fl oz            | F    | 25-Jul | <sup>c</sup> Admire Pro 4.6SC      | 8.7 fl oz               | F             |      |
| 9   | 21-Jun             | <sup>d</sup> Coragen 1.67 SC   | 3.5 fl oz          | F    |        |                                    |                         |               |      |
|     |                    | <sup>b</sup> Agri-Flex 1.55 EC | 8.5 fl oz          | F    | 25 Jul | <sup>d</sup> Besiege 1.25 ZC       | 9 fl oz                 | F             |      |
| 10  | 21-Jun             | <sup>b</sup> Agri-Flex 1.55 EC | 6 fl oz            | F    |        |                                    |                         |               |      |
|     |                    | <sup>b</sup> Blackhawk 36 WG   | 3.3 oz wt          | F    | 25-Jul | <sup>d</sup> Exirel 10 SE          | 5 fl oz                 | F             |      |
| 11  | 21-Jun             | <sup>b</sup> Blackhawk 36 WG   | 2.5 oz wt          | F    |        |                                    |                         |               |      |
|     |                    | <sup>b</sup> Radiant 1 SC      | 8 fl oz            | F    | 25-Jul | <sup>d</sup> Actara 25WDG          | 3 oz wt                 | F             |      |
| 12  | 21-Jun             | <sup>b</sup> Radiant 1 SC      | 6 fl oz            | F    |        |                                    |                         |               |      |
|     |                    | <sup>a</sup> Athena 0.87 EC    | 17 fl oz           | F    | 25-Jul | <sup>b</sup> Admire Pro 550 SC 1.3 | fl oz                   | F             |      |
| 13  | 21-Jun             | <sup>a</sup> Athena 0.87 EC    | 14 fl oz           | F    |        |                                    |                         |               |      |
|     |                    | <sup>d</sup> Actara 25 WDG     | 3 oz wt            | F    | 25-Jul | <sup>d</sup> Besiege 1.25 ZC       | 9 fl oz                 | F             |      |
| 14  | 21-Jun             | <sup>d</sup> Actara 25 WDG     | 1.5 oz wt          | F    |        |                                    |                         |               |      |
|     |                    | <sup>b</sup> Belay 2.13 SC     | 3 fl oz            | F    | 25-Jul | <sup>d</sup> Coragen 1.67 SC       | 5 fl oz                 | F             |      |
| 15  | 21-Jun             | <sup>b</sup> Belay 2.13 SC     | 2.5 fl oz          | F    |        |                                    |                         |               |      |
|     |                    | <sup>a</sup> Exirel 10 SE      | 5 fl oz            | F    | 25-Jul | <sup>a</sup> Belay 2.13 SC         | 3 fl oz                 | F             |      |
|     | 28-Jun             | <sup>a</sup> Exirel 10 SE      | 3 fl oz            | F    |        |                                    |                         |               |      |

<sup>†</sup>F=foliar, IF=In furrow,  
<sup>a</sup>MSO 100 L added at 0.25% vol/vol  
<sup>b</sup>NIS 100 L added at 0.25% vol/vol  
<sup>c</sup>Silwet 100 L added at 0.25% vol/vol  
<sup>d</sup>MSO 100L added at 0.5% vol/vol

Table 2.

| Trt      | CPB/10 plants |            |              | CPB damage   |           |
|----------|---------------|------------|--------------|--------------|-----------|
|          | Adults        | Egg Masses | Small Larvae | Large Larvae | % DF/plot |
| 1        | 9.5a          | 2.1a       | 3.3e         | 3.5cde       | 0.1d      |
| 2        | 7.6a          | 1.4a       | 3.8cde       | 5.6bcd       | 0.1d      |
| 3        | 4.9bc         | 1.3a       | 7.9abc       | 4.0bcd       | 0.3bcd    |
| 4        | 2.5de         | 0.9a       | 2.7de        | 0.5f         | 0.1d      |
| 5        | 3.5de         | 2.2a       | 6.2abc       | 1.8de        | 0.1d      |
| 6        | 7.9ab         | 1.5a       | 18.0abc      | 7.9ab        | 1.3a      |
| 7        | 4.7ab         | 1.3a       | 13.9ab       | 5.2bcd       | 0.4bcd    |
| 8        | 6.7ab         | 1.6a       | 13.5ab       | 4.8bcd       | 1.1ab     |
| 9        | 2.2de         | 1.5a       | 12.5abc      | 1.2ef        | 0.3cd     |
| 10       | 6.5ab         | 1.3a       | 10.3abc      | 5.9bcd       | 0.4bcd    |
| 11       | 7.7ab         | 1.5a       | 12.1abc      | 5.2bcd       | 0.3cd     |
| 12       | 6.8ab         | 1.0a       | 11.4abc      | 6.2a         | 0.9abc    |
| 13       | 4.2bc         | 1.1a       | 5.1bcd       | 4.3bcd       | 0.2d      |
| 14       | 3.9bc         | 1.5a       | 7.2abc       | 3.7bcd       | 0.4bcd    |
| 15       | 1.6e          | 1.3a       | 3.5cde       | 1.8ef        | 0.2d      |
| <i>P</i> | 0.0001        | 0.7618     | 0.0024       | 0.0001       | 0.0305    |
| LSD      | 0.147         | 0.146      | 0.185        | 0.157        | 0.157     |

Means in columns followed by the same letter are not significantly different (Fisher's Protected Least Significant Difference Test,  $P>0.05$ ).

Table 3.

| Trt      | PLH              |                  |               |
|----------|------------------|------------------|---------------|
|          | adults/15 sweeps | nymphs/15 sweeps | GPA/15 sweeps |
| 1        | 0.5de            | 0.1cd            | 0.1a          |
| 2        | 0.6de            | 0.0d             | 0.3a          |
| 3        | 3.5a             | 0.5bc            | 0.5a          |
| 4        | 3.5a             | 1.4a             | 0.4a          |
| 5        | 0.3e             | 0.1cd            | 0.0a          |
| 6        | 0.5de            | 0.6ab            | 0.5a          |
| 7        | 2.8ab            | 0.2bcd           | 0.9a          |
| 8        | 1.4a-d           | 0.2bcd           | 0.2a          |
| 9        | 0.7de            | 0.1cd            | 0.2a          |
| 10       | 1.5b-e           | 0.2bcd           | 1.0a          |
| 11       | 2.0abc           | 0.1cd            | 0.6a          |
| 12       | 0.4e             | 0.0d             | 1.7a          |
| 13       | 0.8de            | 0.0d             | 0.5a          |
| 14       | 0.9cde           | 0.3bcd           | 0.2a          |
| 15       | 2.4abc           | 0.2bcd           | 0.3a          |
| <i>P</i> | 0.0004           | 0.0023           | 0.141         |
| LSD      | 0.158            | 0.0800           | 0.1012        |

Table 4.

| Trt | Total US #1<br>(lbs) | Proportion<br>US #1-A | CWT/acre |
|-----|----------------------|-----------------------|----------|
| 1   | 98.8a                | 85.1a                 | 386a     |
| 2   | 110.1a               | 90.4a                 | 410a     |
| 3   | 92.6a                | 86.3a                 | 392a     |
| 4   | 81.1a                | 78.3a                 | 355a     |
| 5   | 94.0a                | 85.9a                 | 390a     |
| 6   | 82.8a                | 83.3a                 | 378a     |
| 7   | 96.6a                | 86.9a                 | 394a     |
| 8   | 93.6a                | 87.4a                 | 394a     |
| 9   | 102.2a               | 88.6a                 | 402a     |
| 10  | 91.4a                | 88.0a                 | 399a     |
| 11  | 92.6a                | 88.4a                 | 401a     |
| 12  | 97.3a                | 88.7a                 | 402a     |
| 13  | 99.4a                | 86.5a                 | 393a     |
| 14  | 96.0a                | 85.6a                 | 389a     |
| 15  | 90.3a                | 85.7a                 | 390a     |
| P   | 0.0959               | 0.0759                | 0.0759   |
| LSD | 15.4933              | 5.9718                | 271      |

Means in columns followed by the same letter are not significantly different (Fisher's Protected Least Significant Difference Test,  $P>0.05$ ).
